# Supplementary material
Source: publisher site journal article supplement (https://www.dovepress.com/article/238053)
Supplement: Supplementary file 1 [file get_supplementary_file.php]

Appendix. Self-assessment for Hearing Screening of Elderly – Revised (SHSE-R)

| Item | Statement | Never  (0%) | Occasionally (25%) | Half the  time (50%) | Almost  always (75%) | Always (100%) |
| --- | --- | --- | --- | --- | --- | --- |
| 1 | Do you have difficulty understanding when someone talks too quietly? | ① | ② | ③ | ④ | ⑤ |
| 2 | Do you have difficulty hearing sounds such as birds and crickets singing or water flowing? | ① | ② | ③ | ④ | ⑤ |
| 3 | Do you find it difficult to understand mumbled or unclear voices? | ① | ② | ③ | ④ | ⑤ |
| 4 | Do you have difficulty understanding an unfamiliar voice (e.g., stranger) compared to a familiar voice (e.g., friend, family)? | ① | ② | ③ | ④ | ⑤ |
| 5 | Have you ever misunderstood or responded inappropriately to what someone said? | ① | ② | ③ | ④ | ⑤ |
| 6 | Do you wish to increase the TV’s volume when watching it with family because the sound is not clear? | ① | ② | ③ | ④ | ⑤ |
| 7 | Have you ever heard that your voice is too loud when you speak? | ① | ② | ③ | ④ | ⑤ |
| 8 | Do you have difficulty hearing the announcements on public transport (e.g., bus, subway)? | ① | ② | ③ | ④ | ⑤ |
| 9 | Do you have difficulty talking to people in noisy places (e.g., restaurant, subways)? | ① | ② | ③ | ④ | ⑤ |
| 10 | Do you have difficulty understanding speech in a reverberating location (e.g., cathedral, indoor swimming pool)? | ① | ② | ③ | ④ | ⑤ |
| 11 | Do you have difficulty understanding the conversation when several people talk at the same time? | ① | ② | ③ | ④ | ⑤ |
| 12 | Have you missed hearing a doorbell when a guest has visited your house (if there is no doorbell, a knock or a voice calling to you)? | ① | ② | ③ | ④ | ⑤ |
| 13 | Do you have difficulty understanding what others are saying on the phone? | ① | ② | ③ | ④ | ⑤ |
| 14 | Do you find it difficult to communicate in a dark environment where the face is not clearly visible (expression and mouth shape)? | ① | ② | ③ | ④ | ⑤ |
| 15 | Have you ever felt that the TV or radio sound is too fast? | ① | ② | ③ | ④ | ⑤ |
| 16 | Have you ever asked a communication partner to speak slowly because you feel his or her speech is too fast? | ① | ② | ③ | ④ | ⑤ |
| 17 | Have you ever had difficulty remembering the first half while listening to a rather long story? | ① | ② | ③ | ④ | ⑤ |
| 18 | Have you ever asked someone to repeat what was said during a conversation? | ① | ② | ③ | ④ | ⑤ |
| 19 | Have you ever wandered the store aisles because you couldn’t remember after hearing the location of the item you were looking for? | ① | ② | ③ | ④ | ⑤ |
| 20 | Have you ever asked someone to repeat because you don’t remember what you just said? | ① | ② | ③ | ④ | ⑤ |
| Direction: Please circle the answer of each item that comes closest to your everyday experience while considering its percentage from 0% to 100%. | | | | | | |
